# Supplementary material for: Spheroids as a model for endometriotic lesions
Source: JCI journal article supplement (doi:10.1172/jci.insight.160815), 2023-04-27
Supplement: sd1 [file 1]

## **Supplemental Data**

### **Spheroids as a Model for Endometriotic Lesions**

Yong Song†, Gregory W. Burnst†, Niraj R. Joshi, Ripla Arora, J. Julie Kim and Asgerally T. Fazleabas\*

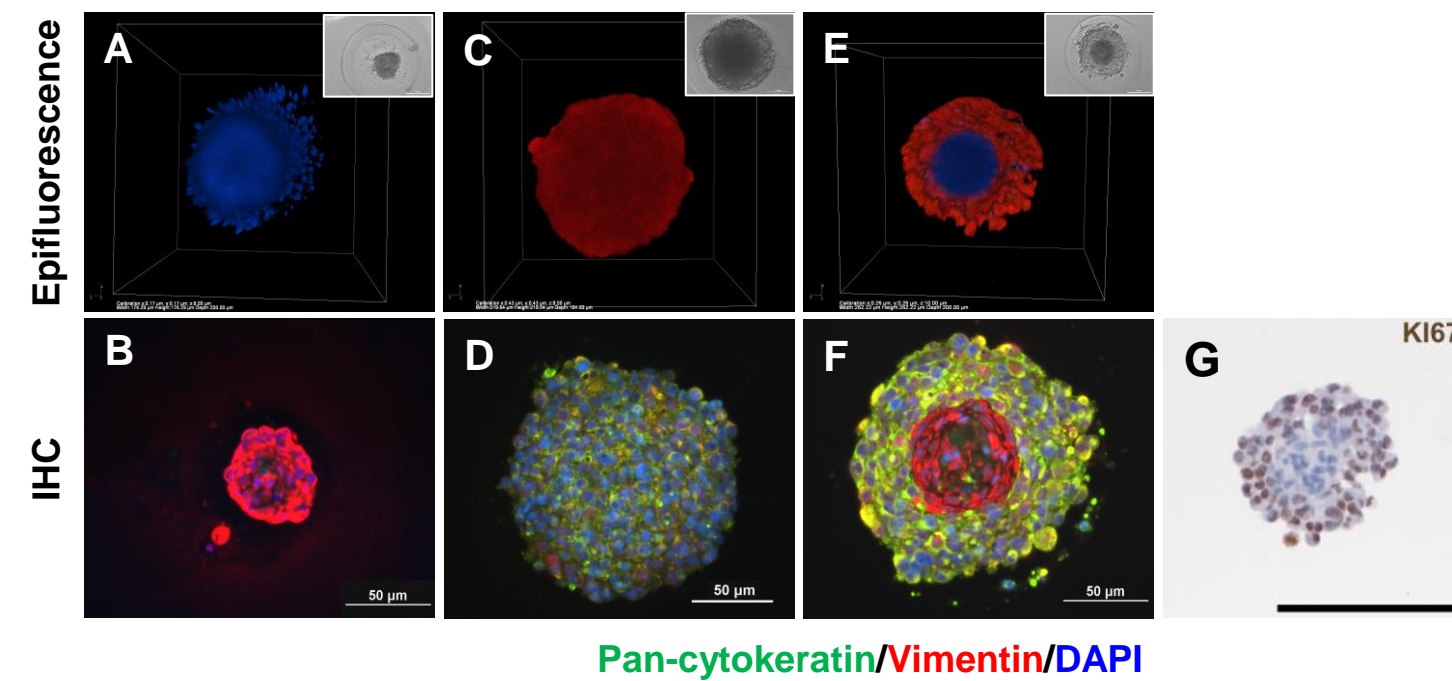

**Supplemental Figure 1. Epithelial and stromal cell organization in spheroid culture.** spheroids made with (A-B) iEc-ESC-Azurite Blue alone, (C-D) 12Z-RFP alone, and (E-F) a combination of both cell types. (A,C,E) Epifluorescent 3D views of spheroid structure. Inserts are matching phase contrast images. (B,D,F) Immunofluorescent spheroid staining for vimentin (red) and cytokeratin (green). Scale bar = 50  $\mu\text{m}$  (G) KI67 positive cells were located on the periphery of endometriotic spheroids, indicating epithelial (12Z) proliferation. Scale bar = 100  $\mu\text{m}$

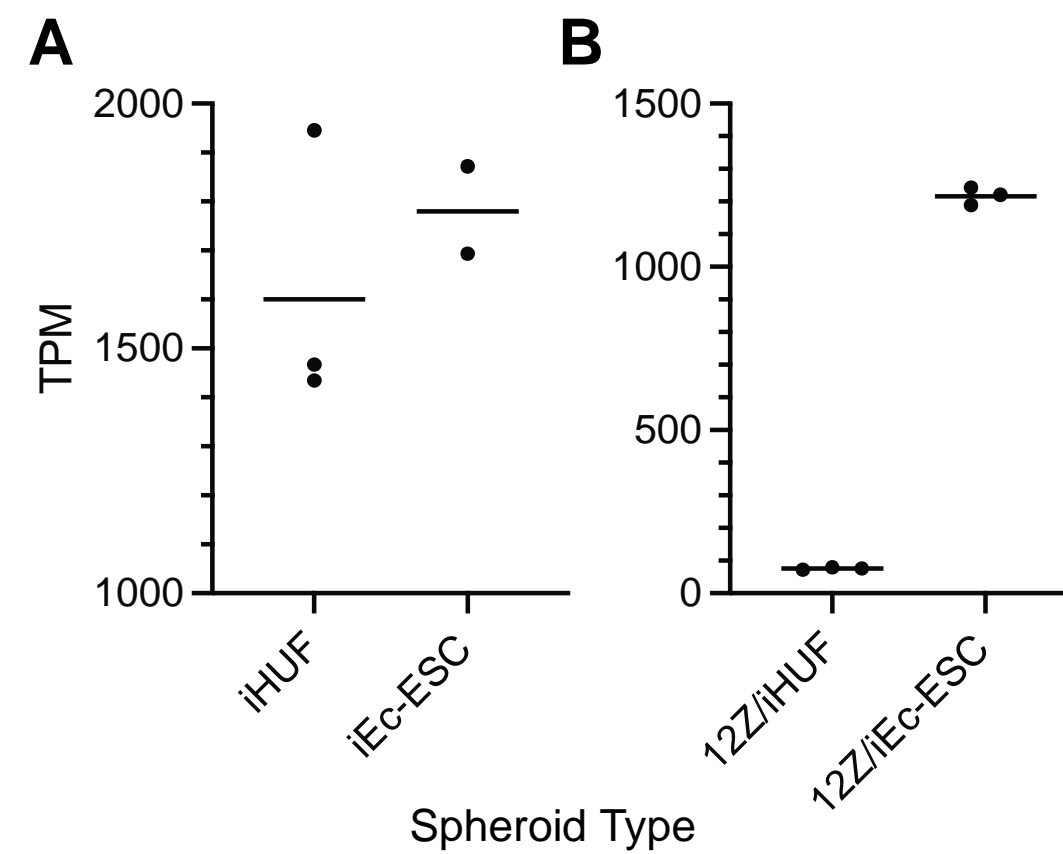

**Supplemental Figure 2. Telomerase reverse transcriptase (*TERT*) expression in spheroids.** (A) Expression was not different between stromal-cell only spheroids ( $n = 5$ , edgeR-robust FDR  $p = 0.91$ ). (B) In contrast, *TERT* was one of the most highly increased genes in endometriotic spheroids (12Z/iEc-ESC, FDR  $p$ -value =  $1.3 \times 10^{-307}$ ). Horizontal bars are the geometric mean. TPM = transcripts per million



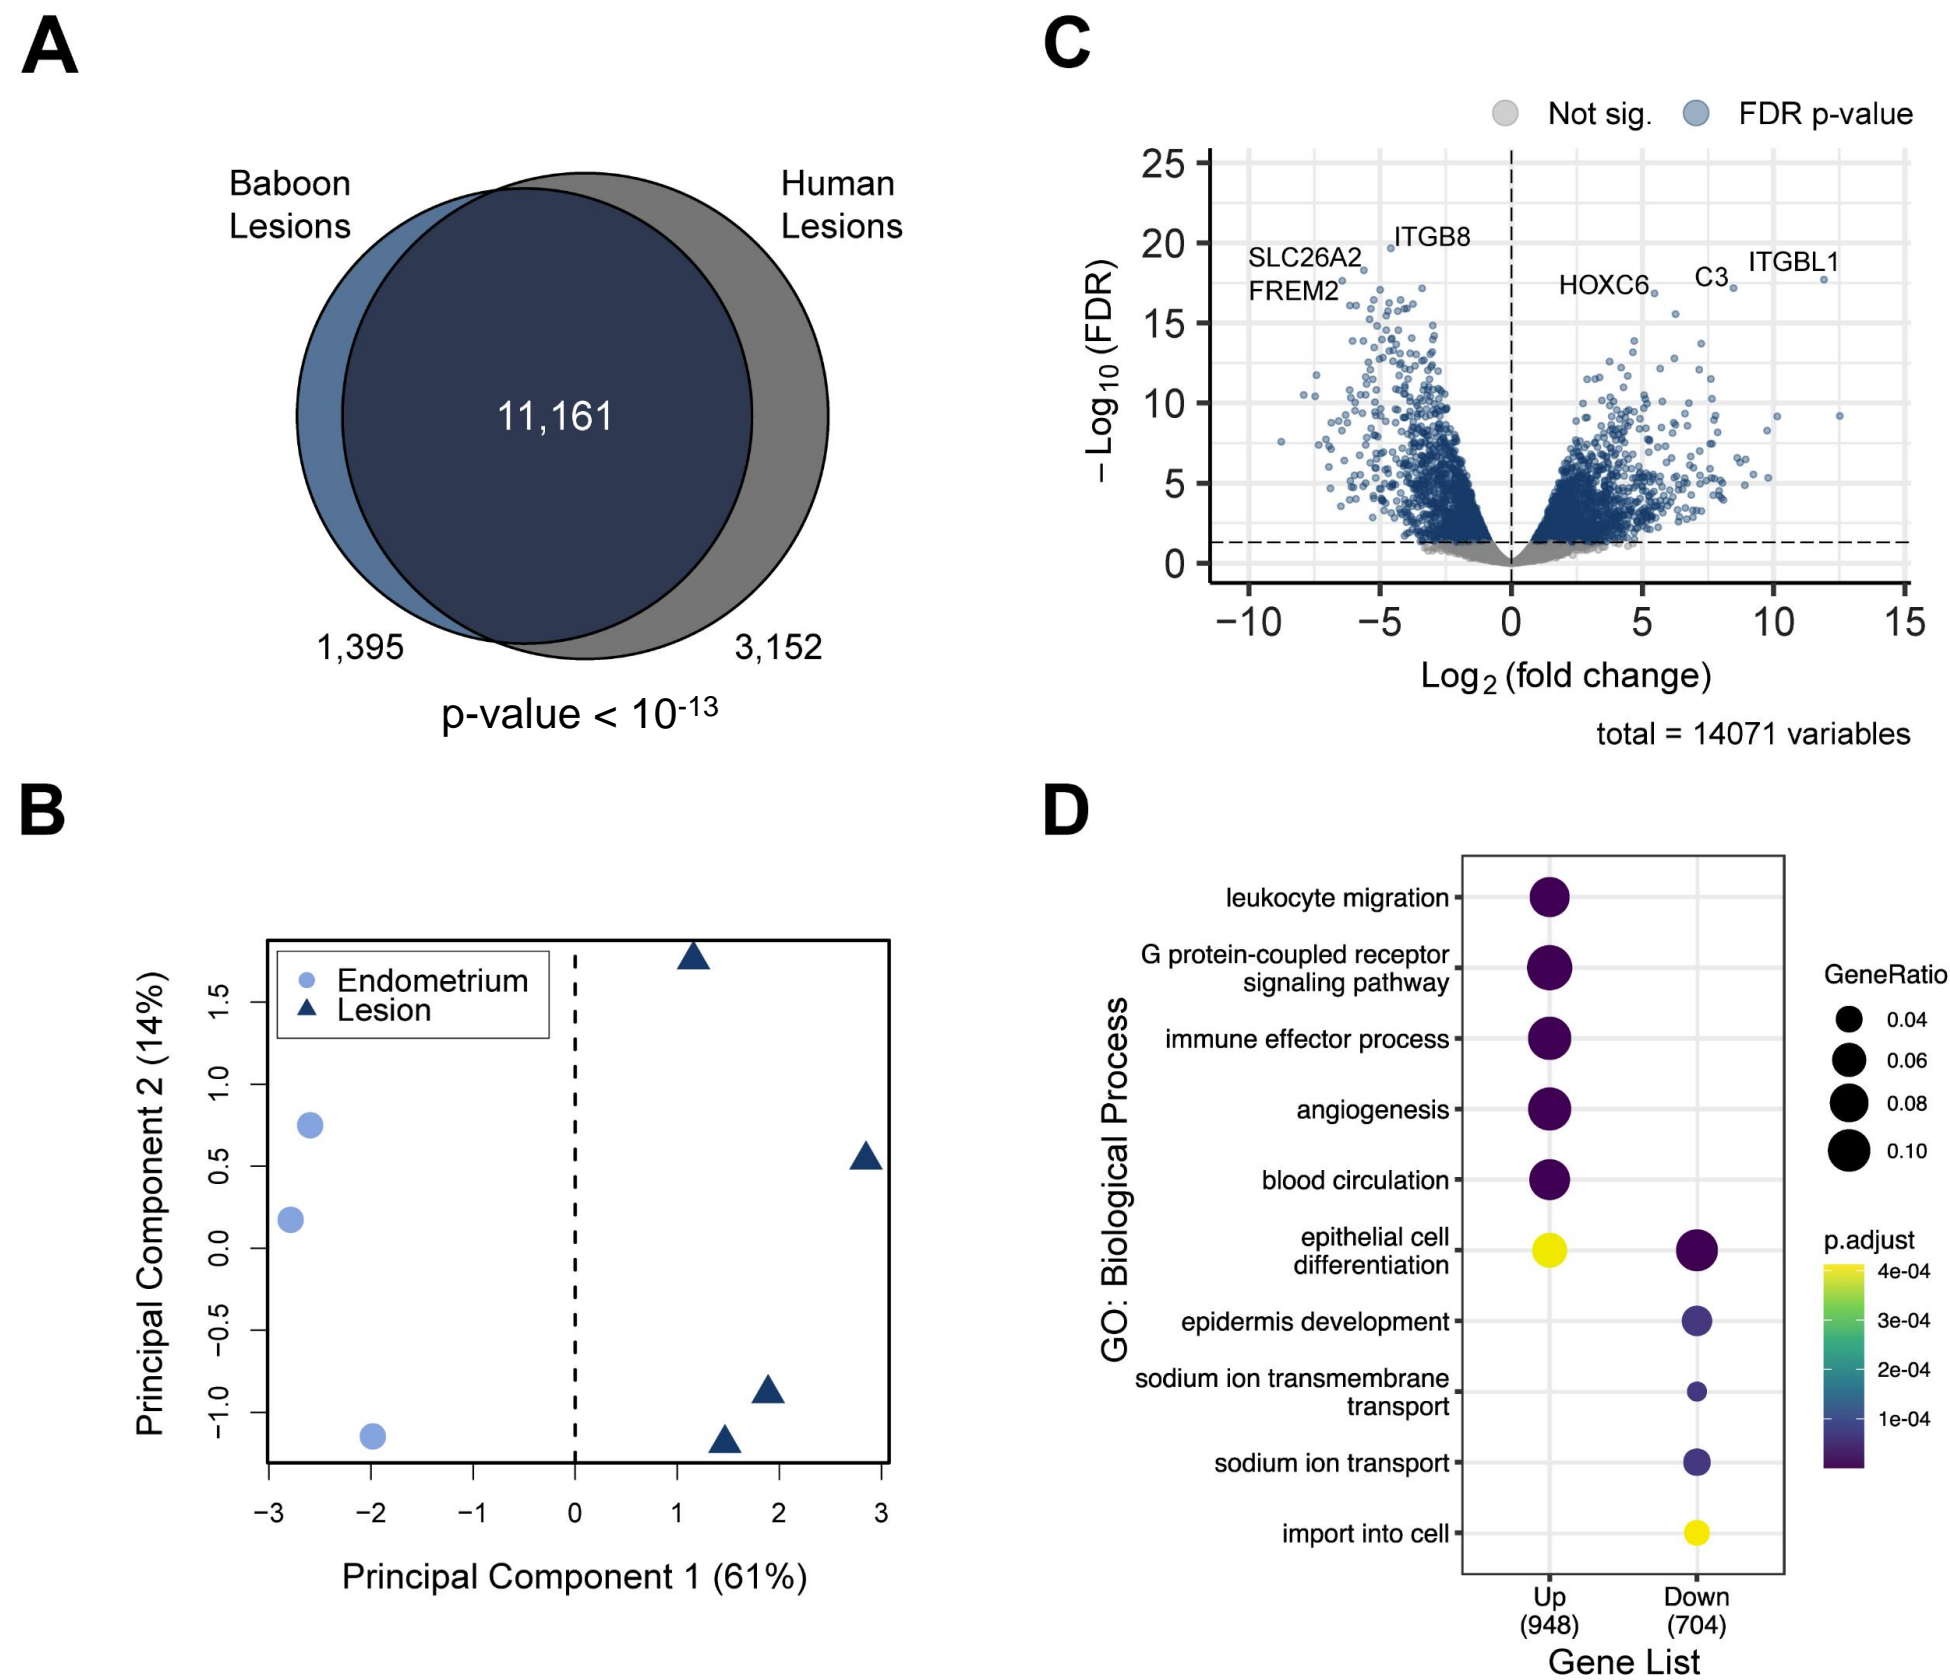

**Supplemental Figure 4. Immune-related and angiogenic genes are increased in baboon spontaneous endometriotic lesions. (A)** Overlap of expressed genes in baboon endometriotic lesions ( $n = 4$ ) with human peritoneal lesions (GSE179640,  $n = 6$ ) was highly significant. **(B)** Separation of endometriotic lesions from eutopic endometrium ( $n = 7$ ) across principal component 1. **(C)** Volcano plot highlighting top differentially expressed genes (edgeR-robust FDR  $p\text{-value} < 0.05$ ). **(D)** The top enriched (hypergeometric FDR  $p\text{-value} < 0.05$ ) biological process terms from up- and down-regulated genes in baboon endometriotic lesions.

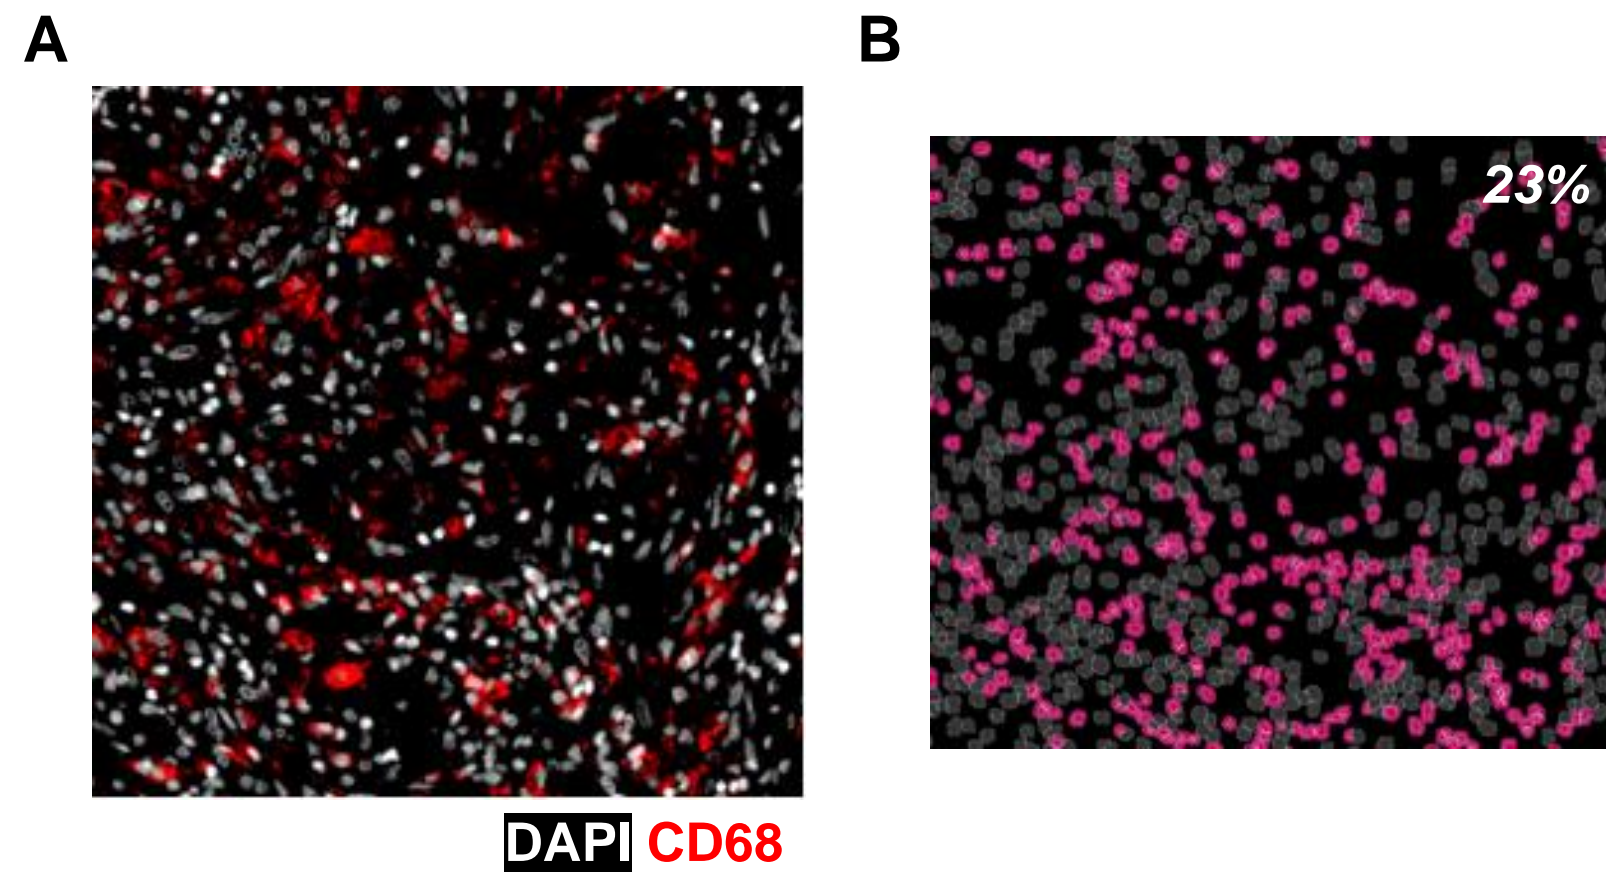

**Supplemental Figure 5. Macrophages are present in baboon endometriotic lesions.** (A) Fluorescent immunohistochemical staining of baboon endometriotic lesions with CD68 (red), a pan-macrophage marker. (B) Quantification found 23% of cells were CD68 positive.

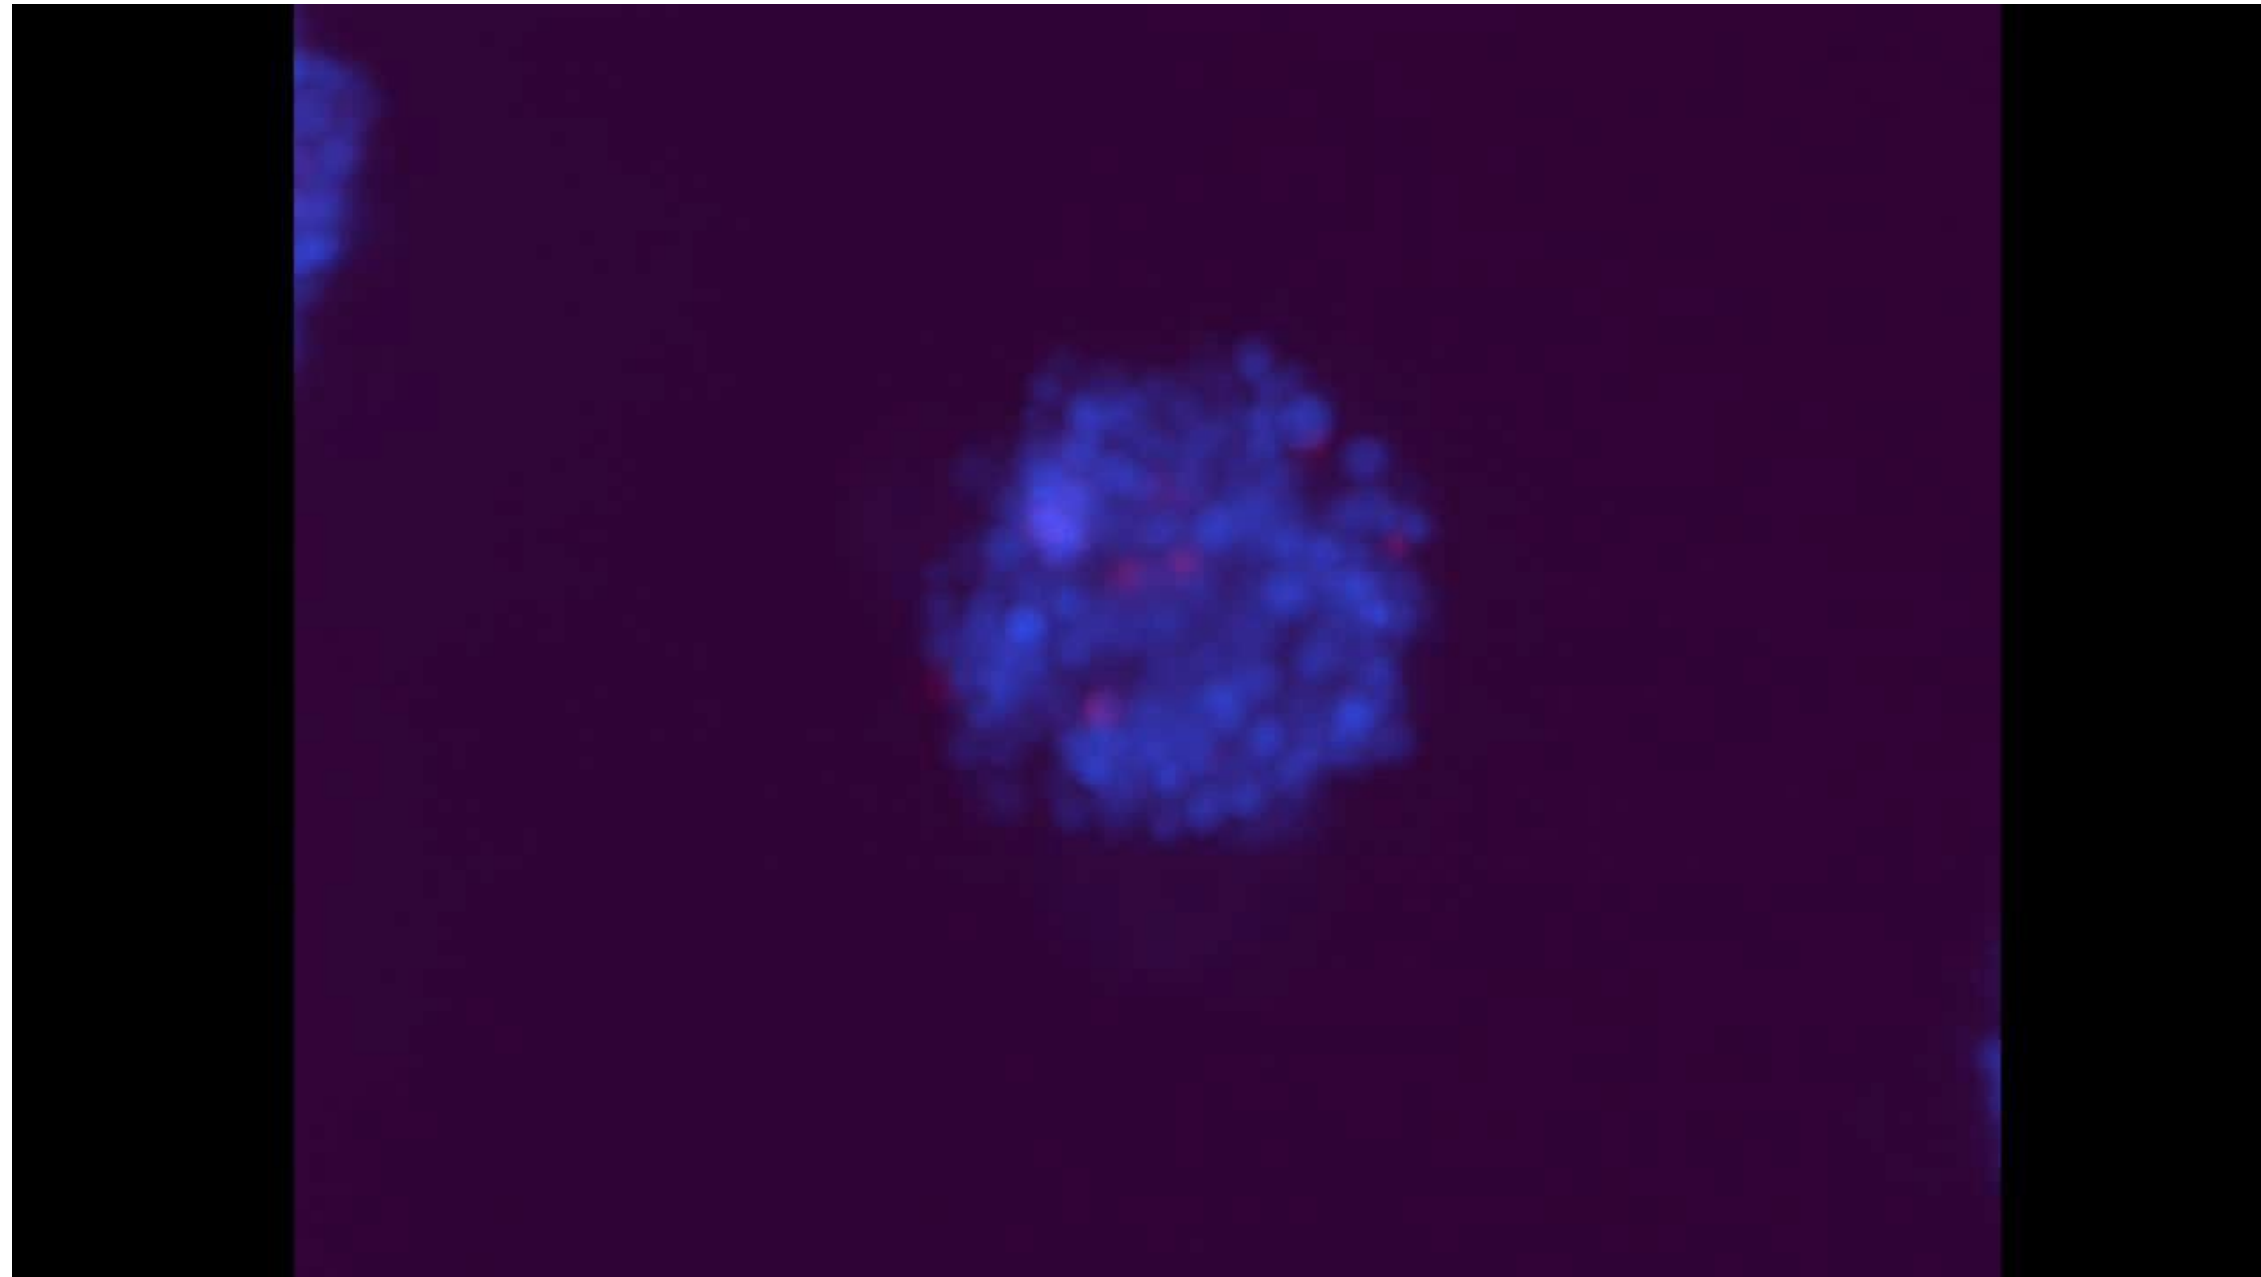

**Supplemental Video 1. Endometriotic spheroids self-organize into epithelium and stroma compartments.** See related video at <https://insight.jci.org/articles/view/160815/sd/1>. A representative time-lapse imaging video of ES formation (12Z/iEc-ESC) over the first 3 days of culture. Note the migration of 12Z epithelial cells to the periphery of the stromal cells.

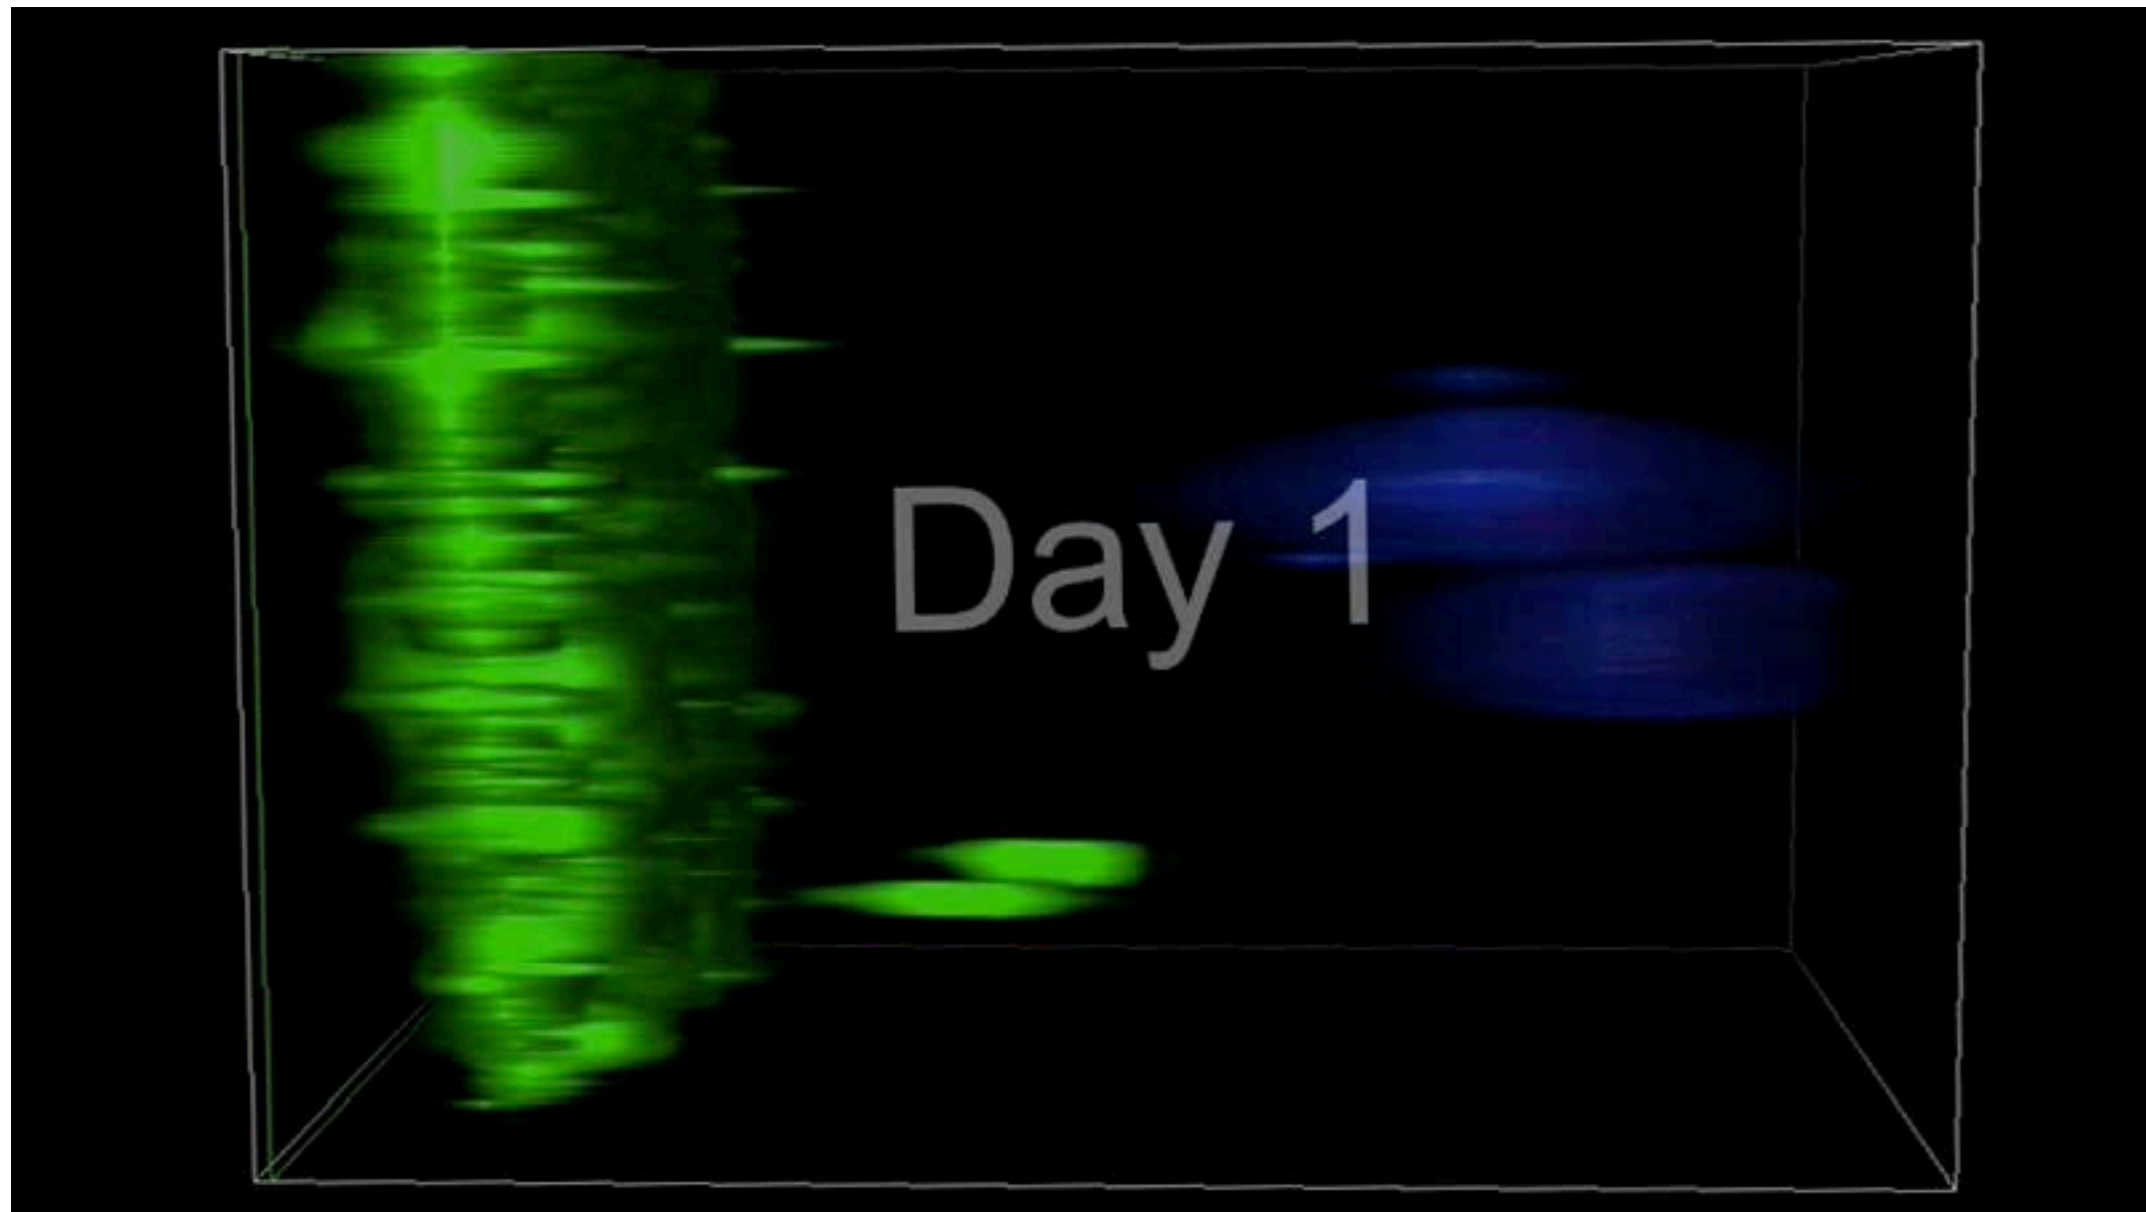

**Supplemental Video 2. Confocal live-imaging of ES invasion through a mesothelial cell layer over 8 days. See related video at <https://insight.jci.org/articles/view/160815/sd/2>. Endometriotic epithelial cells (12Z) express RFP, endometriotic stromal cells (iEc-ESC) express Azurite Blue, and the mesothelial cells (LP9) express GFP.**
